# Supplementary material for: An anion-exchange strategy for 3D hierarchical (BiO)2CO3/amorphous Bi2S3 heterostructures with increased solar absorption and enhanced visible light photocatalysis
Source: Royal Society of Chemistry journal article supplement (doi:10.1039/c4ra15798b), 2015-01-01
Supplement: c4ra15798b1.pdf [file c4ra15798b1.pdf]

**Electronic Supplementary Information for**

**An anion-exchange strategy for 3D hierarchical (BiO)<sub>2</sub>CO<sub>3</sub>/amorphous Bi<sub>2</sub>S<sub>3</sub>  
heterostructures with increased solar absorption and enhanced visible light  
photocatalysis**

**Fan Dong <sup>a,\*</sup>, Xin Feng <sup>a</sup>, Yuxin Zhang <sup>b</sup>, Chunfeng Gao <sup>a</sup>, and Zhongbiao Wu <sup>c,\*</sup>**

<sup>a</sup> Chongqing Key Laboratory of Catalysis and Functional Organic Molecules, College of Environmental and Biological Engineering, Chongqing Technology and Business University, Chongqing, 400067, China.

<sup>b</sup> College of Materials Science and Engineering, Chongqing University, Chongqing, 400044, P.R. China.

<sup>c</sup> Department of Environmental Engineering, Zhejiang University, Hangzhou, Zhejiang 310027, China.

\* To whom correspondence should be addressed.

E-mail: dfctbu@126.com (Fan Dong); zbwu@zju.edu.cn (Zhonbiao Wu). Tel.: +86-23-62769785-605;  
Fax: +86-23-62769785-605.

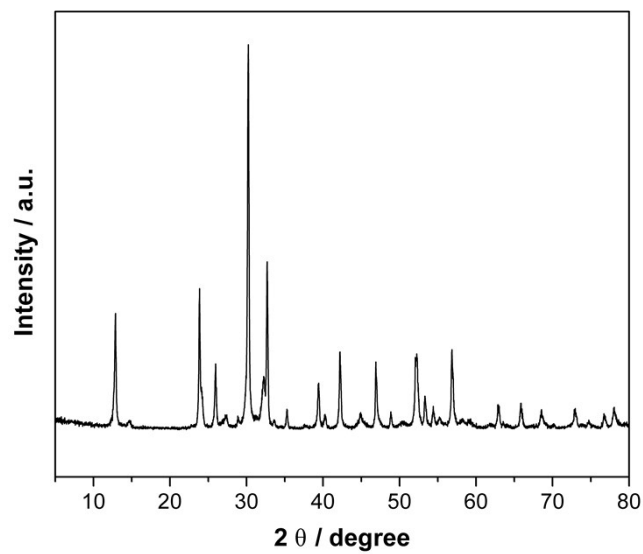

**Fig. S1** XRD of the composites sample by hydrothermal treatment of the anion-exchange process.
